# Supplementary material
Source: PubMed Central journal article supplement (PMC7196909)
Supplement: pnas.1919934117.sapp.pdf [file pnas.1919934117.sapp.pdf]

**Supplementary Information for: Neuroticism May Not Reflect Emotional Variability**

Elise K. Kalokerinos †\*<sup>a</sup> – [elise.kalokerinos@unimelb.edu.au](mailto:elise.kalokerinos@unimelb.edu.au)

Sean C. Murphy †<sup>a</sup> – [seanchrismurphy@gmail.com](mailto:seanchrismurphy@gmail.com)

Peter Koval <sup>a,b</sup> – [p.koval@unimelb.edu.au](mailto:p.koval@unimelb.edu.au)

Natasha H. Bailen <sup>c</sup> – [nharadhvala@wustl.edu](mailto:nharadhvala@wustl.edu)

Geert Crombez <sup>d</sup> – [Geert.Crombez@ugent.be](mailto:Geert.Crombez@ugent.be)

Tom Hollenstein <sup>e</sup> – [tom.hollenstein@queensu.ca](mailto:tom.hollenstein@queensu.ca)

John Gleeson <sup>f</sup> – [John.Gleeson@acu.edu.au](mailto:John.Gleeson@acu.edu.au)

Renee J. Thompson <sup>g</sup> – [reneejthompson@gmail.com](mailto:reneejthompson@gmail.com)

Dimitri M.L. Van Ryckeghem <sup>d,h</sup> – [Dimitri.VanRyckeghem@ugent.be](mailto:Dimitri.VanRyckeghem@ugent.be)

Peter Kuppens <sup>b</sup> – [peter.kuppens@kuleuven.be](mailto:peter.kuppens@kuleuven.be)

Brock Bastian <sup>a</sup> – [brock.bastian@unimelb.edu.au](mailto:brock.bastian@unimelb.edu.au)

†*These authors contributed equally to this work*

<sup>a</sup> Melbourne School of Psychological Sciences, The University of Melbourne, Parkville, Victoria, Australia 3010

<sup>b</sup> Faculty of Psychology and Educational Sciences, KU Leuven, Tiensestraat 102, Leuven, Belgium 3000

<sup>c</sup> Department of Psychological and Brain Sciences, Washington University in St. Louis, CB1125, One Brookings Drive, St Louis, MO, United States of America, 63130-4899

<sup>d</sup> Faculty of Psychology and Educational Sciences, Ghent University, Henri Dunantlaan 2, Ghent, Belgium 9000

<sup>e</sup> Department of Psychology, Queen's University, 62 Arch Street, Humphrey Hall Room 232, Kingston, Ontario, Canada K7L 3N6

<sup>f</sup> School of Psychology, Australian Catholic University, 115 Victoria Parade, Fitzroy, Victoria, Australia 3065

<sup>g</sup> Faculty of Psychology and Neuroscience, Maastricht University, Universiteitssingel 40, Maastricht, the Netherlands 6229

\* Corresponding author: Elise K. Kalokerinos, <sup>1</sup>Melbourne School of Psychological Sciences, The University of Melbourne, Parkville, Victoria, Australia 3010, Phone: +61 3 8344 6417

**Email:** [elise.kalokerinos@unimelb.edu.au](mailto:elise.kalokerinos@unimelb.edu.au)

**This PDF file includes:**

Supplementary text

Figures S1 to S11

Tables S1 to S3

## Table of Contents

|                                                                                                                                                                                                                       |    |
|-----------------------------------------------------------------------------------------------------------------------------------------------------------------------------------------------------------------------|----|
| Part 1: Additional Details of Study Methods .....                                                                                                                                                                     | 3  |
| <i>Table S1. Additional Details about Study Design and Context for Each Dataset.</i> .....                                                                                                                            | 3  |
| <i>Table S2. Additional Information about the Measurement of Negative Emotion and Neuroticism in each Dataset.</i> .....                                                                                              | 4  |
| Part 2: Descriptive Statistics .....                                                                                                                                                                                  | 6  |
| <i>Table S3. Descriptive Statistics for Negative Emotion and Neuroticism.</i> .....                                                                                                                                   | 6  |
| Part 3: Analyses Using the MSSD .....                                                                                                                                                                                 | 6  |
| <i>Figure S1. Forest plot of the association between neuroticism and the MSSD of negative emotion.</i> .....                                                                                                          | 7  |
| <i>Figure S2. Forest plot of the association between neuroticism and instability in maximum daily negative emotion (for experience sampling datasets with multiple measures per day only).</i> .....                  | 8  |
| <i>Figure S3. Forest plot of the association between neuroticism and relative instability in negative emotion.</i> .....                                                                                              | 8  |
| Part 4: Separate Analyses for BFI and TIPI.....                                                                                                                                                                       | 9  |
| <i>Figure S4. Forest plot of the association between neuroticism and negative emotional variability for datasets using the BFI.</i> .....                                                                             | 9  |
| <i>Figure S5. Forest plot of the association between neuroticism and negative emotional variability for datasets using the TIPI.</i> .....                                                                            | 10 |
| <i>Figure S6. Forest plot of the association between neuroticism and variability in maximum daily negative emotion for datasets using the BFI.</i> .....                                                              | 10 |
| <i>Figure S7. Forest plot of the association between neuroticism and variability in maximum daily negative emotion for datasets using the TIPI.</i> .....                                                             | 11 |
| <i>Figure S8. Forest plot of the association between neuroticism and relative variability in negative emotion for datasets using the BFI.</i> .....                                                                   | 11 |
| <i>Figure S9. Forest plot of the association between neuroticism and relative variability in negative emotion for datasets using the TIPI.</i> .....                                                                  | 12 |
| Part 5: Relationship between Negative Emotion Within-Person SD Across all Time-Points and Within-Person SD for Daily Maxima .....                                                                                     | 12 |
| <i>Figure S10. Forest plot of the association between variability across all time-points and variability in maximum daily negative emotion for experience-sampling datasets.</i> .....                                | 13 |
| Part 6: Correlation Between 1) Neuroticism and the Negative Emotion Within-Person SD After Partialling Out Mean Levels, and 2) Neuroticism and the Negative Emotion Mean After Partialling Out Within-Person SD ..... | 13 |
| <i>Figure S11. Forest plot of the association between neuroticism and the adjusted within-person SD of negative emotion after partialling out the effect of mean levels.</i> .....                                    | 13 |

## Part 1: Additional Details of Study Methods

Table S1 outlines additional details about the study design and context for each of the 11 datasets used in our research. Table S2 includes more information about the measurement and reliability of negative emotion and neuroticism.

*Table S1. Additional Details about Study Design and Context for Each Dataset.*

| <b>Dataset</b> | <b>Sampling schedule</b>                         | <b>Mean number of observations per participant</b> | <b>Context of broader study</b>                                           | <b>Country</b> | <b>Sample</b>                                                    | <b>Exclusions</b>                                                              |
|----------------|--------------------------------------------------|----------------------------------------------------|---------------------------------------------------------------------------|----------------|------------------------------------------------------------------|--------------------------------------------------------------------------------|
| 1              | End of day                                       | 14.00                                              | Healthy controls from a study examining affect regulation in Fibromyalgia | Belgium        | Healthy participants recruited from the community                | Initial N=49. Excluded 1 equipment failure, 1 outlier on HRV, 1 low compliance |
| 2              | End of day                                       | 27.60                                              | Depressive symptoms and social expectancies about emotion                 | United States  | Mturk participants above PHQ-2 clinical cut-off for depression   | Initial N=121. Excluded 9 low compliance                                       |
| 3              | End of day                                       | 6.83                                               | Emotion in daily negative events                                          | United States  | Mturk participants selected to maximize variation on neuroticism | Initial N=121. Excluded 1 for missing attention checks, 8 low compliance*      |
| 4              | Stratified random interval in a 12-hour period   | 199.40                                             | Emotion in daily life                                                     | Australia      | Community members                                                | Initial N=186. 7 withdrew, excluded 3 low compliance                           |
| 5              | Stratified random interval between 10am and 10pm | 70.49                                              | Emotion in students starting university: wave 1 of longitudinal study     | Belgium        | Students, sample stratified on depressive symptoms               | Initial N=202. Excluded 2 low compliance                                       |
| 6              | Stratified random interval between 10am and 10pm | 66.64                                              | Emotion in daily life                                                     | Belgium        | Students, sample stratified on depressive symptoms               | Initial N=100. 1 withdrew, excluded 3 technical problems**                     |
| 7              | Stratified random interval between               | 71.22                                              | Sexual objectification in women                                           | Australia      | Women recruited online and at                                    | Initial N=82. 1 withdrew, excluded 2                                           |

|    |                                                       |       |                                                                                             |               |                                                 |                                                                                                           |
|----|-------------------------------------------------------|-------|---------------------------------------------------------------------------------------------|---------------|-------------------------------------------------|-----------------------------------------------------------------------------------------------------------|
|    | 10 am and midnight                                    |       |                                                                                             |               | university campus                               | low compliance                                                                                            |
| 8  | Stratified random interval between 10 am and midnight | 72.21 | Sexual objectification in women                                                             | Australia     | Women recruited online and at university campus | Initial N=90. 1 withdrew, excluded 2 because previously participated in dataset 7 study, 2 low compliance |
| 9  | Stratified random interval between 10 am and midnight | 71.94 | Sexual objectification in women                                                             | United States | Women recruited online and at university campus | Initial N=100. Excluded 3 low compliance                                                                  |
| 10 | Stratified random interval, between 10am and 10pm     | 98.00 | Emotion regulation in daily life                                                            | Belgium       | Community                                       | Initial N=104. Excluded 4 low compliance                                                                  |
| 11 | Stratified random interval, between 10am and 10pm     | 90.12 | Emotion among students 2 days before and 7 days after receiving first semester exam results | Belgium       | First-year psychology students                  | None                                                                                                      |

*Notes.* Low compliance = completed less than 50% of observations. \*Previous studies with these data used N = 114, because diaries without negative events were removed *after* removing low compliance participants. In this study we removed the diaries without negative events *before* removing low compliance participants, resulting in the removal of two participants who fell under the compliance threshold only when their non-negative events were removed. \*\*Previous studies used N = 95, excluding one additional participant for low compliance. We do not exclude this participant because we calculated compliance for each participant based on the number of surveys actually received by that particular participant, rather than the maximum number of surveys that they could have possibly received. Some participants received slightly fewer surveys depending on the time of day they completed their baseline session.

*Table S2. Additional Information about the Measurement of Negative Emotion and Neuroticism in each Dataset.*

| Dataset | Negative emotion                                 |                                                |                                               |                                |                              | Neuroticism |                          |
|---------|--------------------------------------------------|------------------------------------------------|-----------------------------------------------|--------------------------------|------------------------------|-------------|--------------------------|
|         | Emotions assessed                                | Item stem                                      | Original response scale                       | Reliability                    |                              | Scale       | Reliability ( $\alpha$ ) |
|         |                                                  |                                                |                                               | Between-person R <sub>KF</sub> | Within-person R <sub>C</sub> |             |                          |
| 1       | Angry, Afraid, Sad, Anxious, Irritated, Nervous, | To what extent do you agree with the following | 7-point Likert 0 = <i>do not agree at all</i> | .99                            | .86                          | TIPI        | .42                      |

|    |                                                                                   |                                                                                                   |                                                                                    |     |     |      |     |
|----|-----------------------------------------------------------------------------------|---------------------------------------------------------------------------------------------------|------------------------------------------------------------------------------------|-----|-----|------|-----|
|    | Dejected,<br>Frustrated,<br>Hopeless,<br>Infuriated,<br>Powerless                 | statements?<br>Today I felt<br>_____                                                              | 6 = <i>totally agree</i>                                                           |     |     |      |     |
| 2  | Angry, Sad,<br>Stressed                                                           | Today, to what extent did you feel _____?                                                         | 7-point Likert<br>1 = <i>not at all</i><br>7 = <i>very much</i>                    | .99 | .80 | TIPI | .83 |
| 3  | Angry, Afraid,<br>Sad, Irritated,<br>Nervous,<br>Depressed,<br>Guilty,<br>Ashamed | To what extent did you feel each of the following emotions during the event you recalled earlier? | 7-point Likert<br>1 = <i>not at all</i><br>7 = <i>very much</i>                    | .96 | .72 | BFI  | .95 |
| 4  | Angry, Sad,<br>Stressed                                                           | How _____ do you feel right now?                                                                  | 0 = <i>not at all [emotion]</i><br>100 = <i>very [emotion]</i>                     | .99 | .62 | BFI  | .84 |
| 5  | Angry, Sad,<br>Stressed,<br>Anxious,<br>Depressed                                 | How _____ do you feel at the moment?                                                              | 100- point slider<br>1 = <i>not at all</i><br>100 = <i>very much</i>               | .99 | .72 | TIPI | .59 |
| 6  | Angry, Sad,<br>Stressed,<br>Anxious,<br>Depressed                                 | How _____ do you feel at the moment?                                                              | 100-point slider<br>1 = <i>not at all [emotion]</i><br>100 = <i>very [emotion]</i> | .99 | .74 | TIPI | .71 |
| 7  | Angry, Sad,<br>Anxious, Guilty                                                    | Right now, how _____ do you feel?                                                                 | 100-point slider<br>1 = <i>not at all [emotion]</i><br>100 = <i>very [emotion]</i> | .99 | .62 | BFI  | .84 |
| 8  | Angry, Afraid,<br>Sad, Anxious,<br>Embarrassed,<br>Guilty,<br>Ashamed             | Right now, how _____ do you feel?                                                                 | 100-point slider<br>1 = <i>not at all [emotion]</i><br>100 = <i>very [emotion]</i> | .99 | .76 | TIPI | .55 |
| 9  | Angry, Afraid,<br>Sad, Anxious,<br>Embarrassed,<br>Guilty,<br>Ashamed             | Right now, how _____ do you feel?                                                                 | 100-point slider<br>1 = <i>not at all [emotion]</i><br>100 = <i>very [emotion]</i> | .99 | .75 | TIPI | .68 |
| 10 | Angry, Sad,<br>Stressed                                                           | How _____ did you feel during the event?                                                          | 100-point slider<br>1 = <i>not at all [emotion]</i><br>100 = <i>very [emotion]</i> | .99 | .62 | BFI  | .83 |
| 11 | General negative affect                                                           | Please indicate how negative you are feeling right now                                            | 100-point slider<br>0 = <i>neutral</i><br>100 = <i>very negative</i>               | -   | -   | BFI  | .88 |

*Note.* Reliability for negative emotion is not provided for dataset 11, since it was assessed with a single item. For negative emotion, we calculated within- and between-person reliability using equations from Shrout and Lane (2012) implemented in the psych package in R (Revelle, 2017). Between-person reliability ( $R_{KF}$ ) is the consistency of item responses over time and across people, Within-person reliability ( $R_c$ ) is the consistency between items within individuals. For neuroticism, reliability is assessed using Cronbach's alpha. TIPI = Ten Item Personality Inventory. BFI = Big Five Inventory

## Part 2: Descriptive Statistics

Table S3 displays descriptive statistics for neuroticism and negative emotion for each dataset.

*Table S3. Descriptive Statistics for Negative Emotion and Neuroticism*

| Dataset | Negative Emotion |                   |                          |                       |                                    | Neuroticism   |
|---------|------------------|-------------------|--------------------------|-----------------------|------------------------------------|---------------|
|         | <i>M</i>         | Between <i>SD</i> | Average Within <i>SD</i> | Average daily maximum | Average Relative variability index | <i>M (SD)</i> |
| 1       | 2.19             | 0.94              | 0.72                     | -                     | 0.39                               | 3.24 (1.26)   |
| 2       | 3.52             | 1.09              | 1.03                     | -                     | 0.38                               | 4.42 (1.77)   |
| 3       | 2.85             | 0.96              | 0.70                     | -                     | 0.27                               | 3.66 (1.66)   |
| 4       | 2.33             | 0.81              | 0.80                     | 3.37                  | 0.36                               | 3.94 (1.20)   |
| 5       | 1.86             | 0.51              | 0.58                     | 2.69                  | 0.29                               | 3.27 (1.32)   |
| 6       | 2.00             | 0.67              | 0.62                     | 2.90                  | 0.30                               | 3.37 (1.52)   |
| 7       | 2.28             | 0.83              | 0.73                     | 3.33                  | 0.34                               | 4.14 (1.20)   |
| 8       | 1.65             | 0.71              | 0.51                     | 2.47                  | 0.33                               | 3.30 (1.32)   |
| 9       | 1.69             | 0.68              | 0.50                     | 2.48                  | 0.31                               | 3.59 (1.48)   |
| 10      | 1.96             | 0.55              | 0.80                     | 2.62                  | 0.35                               | 4.25 (1.06)   |
| 11      | 2.19             | 0.81              | 0.98                     | 2.98                  | 0.39                               | 4.49 (1.66)   |

## Part 3: Analyses Using the MSSD

In the main text, we focused on emotional variability assessed using the within-person standard deviation of negative emotion. Here, we replicate our main analyses with the Mean Squared Successive Difference (MSSD) between consecutive negative emotion scores, an indicator of moment-to-moment instability that is positively associated with neuroticism but suffers from the same dependency with the mean as the within-person *SD*. Analyses are conducted exactly as reported in the main text, except substituting MSSD in place of the within-person *SD*. Below, we show that the results for the MSSD echo those demonstrated with the within-person *SD* reported in the main text.

In all meta-analytic forest plot figures, we provide a correlation bounded by a 95% confidence interval (CI) for each dataset. The area of each square is proportional to the weight of the study in the meta-analysis. The results of the random effects meta-analysis are depicted at the bottom of the figure (RE model), with the width of the rhombus representing the 95% CI. The dotted line represents no effect.

Figure S1 provides the results of a meta-analysis of the relationship between neuroticism and the MSSD of negative emotion, with no correction for mean negative emotion. Replicating previous work, neuroticism had a significant positive correlation with negative emotion instability as conceptualized with the MSSD.

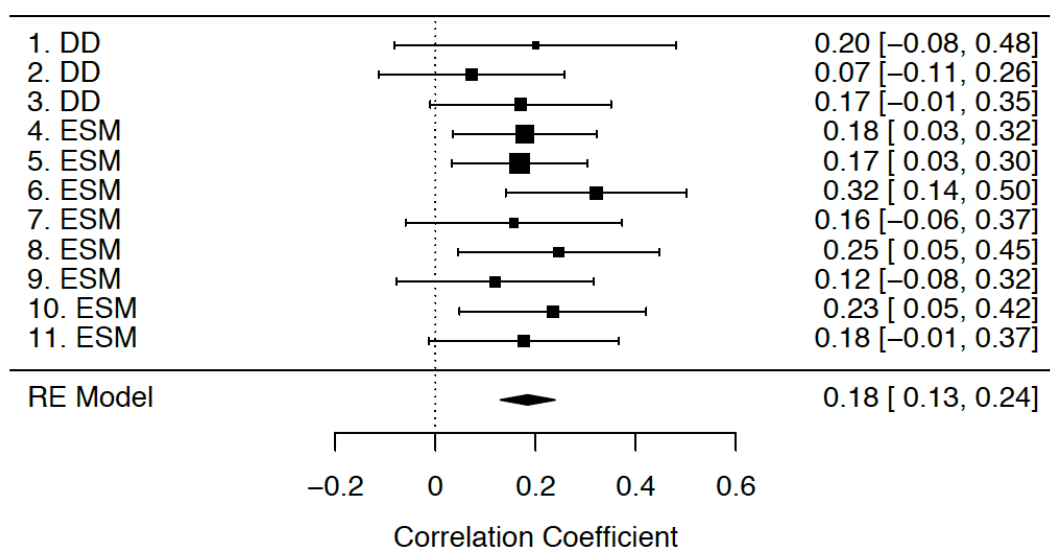

Figure S1. Forest plot of the association between neuroticism and the MSSD of negative emotion.

Figure S2 provides the results of a meta-analysis of the relationship between neuroticism and instability in the maximum daily negative emotion for the experience sampling datasets (where there were multiple measurements of negative emotion per day). Here, we found no relationship between neuroticism and the MSSD based on the daily maximum.

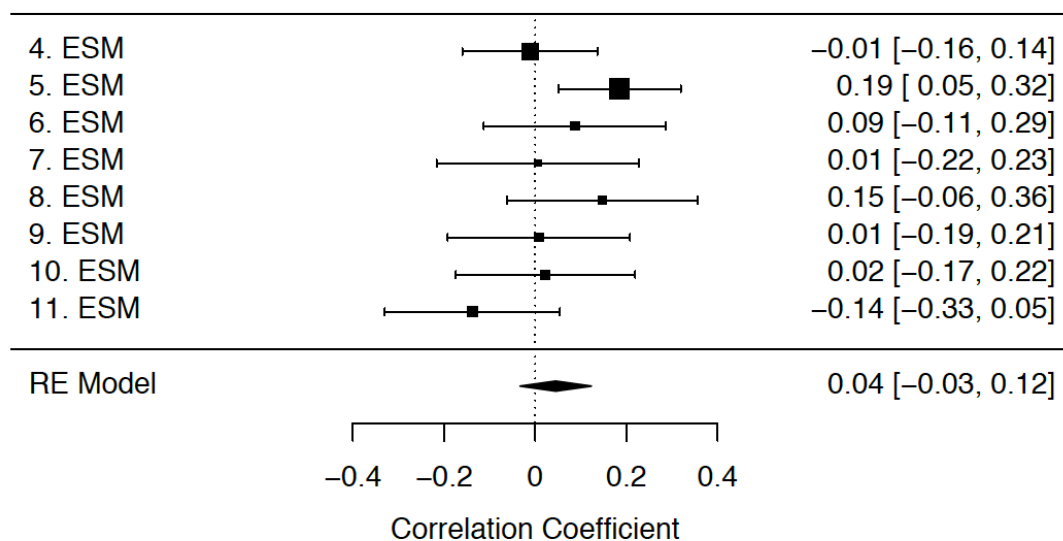

Figure S2. Forest plot of the association between neuroticism and instability in maximum daily negative emotion (for experience sampling datasets with multiple measures per day only).

Figure S3 provides the results of a meta-analysis of the relationship between neuroticism and the relative instability in negative emotion. This measure statistically corrects for the confound between instability and mean levels of negative emotion. Here, we unexpectedly found a small negative association, such that low neuroticism was associated with higher relative MSSD. When correcting for the mean, less neurotic people actually showed more unstable negative emotions.

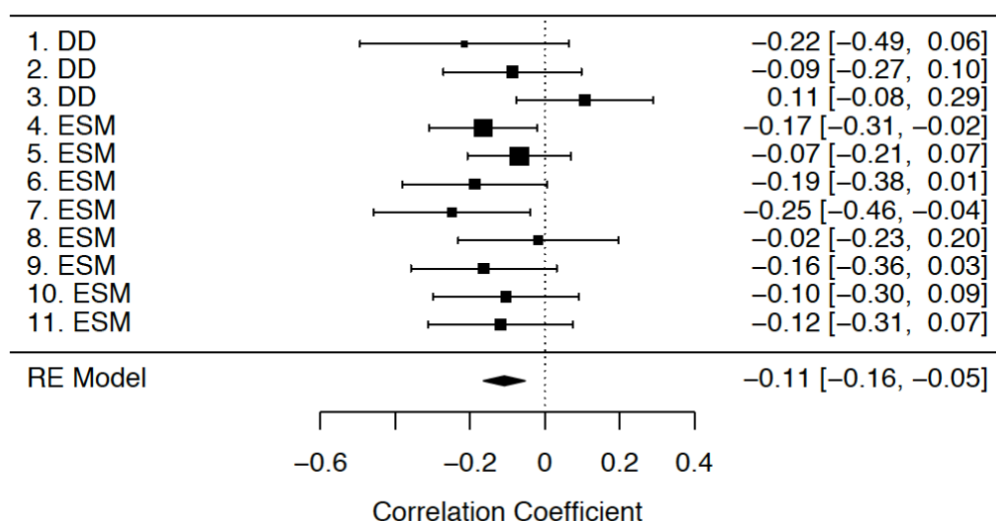

Figure S3. Forest plot of the association between neuroticism and relative instability in negative emotion.



#### Part 4: Separate Analyses for BFI and TIPI

Here, we present the results of the main sets of analyses separately for datasets using the Big Five Inventory (BFI) and the Ten Item Personality Inventory (TIPI) to measure neuroticism. Results are similar for the two groups of datasets, suggesting that our findings are not driven by reliability issues with the TIPI.

In all meta-analytic forest plot figures, we provide a correlation bounded by a 95% confidence interval (CI) for each dataset. The area of each square is proportional to the weight of the study in the meta-analysis. The results of the random effects meta-analysis are depicted at the bottom of the figure (RE model), with the width of the rhombus representing the 95% CI. The dotted line represents no effect.

Figure S4 provides the results of a meta-analysis of the relationship between neuroticism and the within-person *SD* of negative emotion for datasets using the BFI. Figure S5 provides the same analyses for datasets using the TIPI

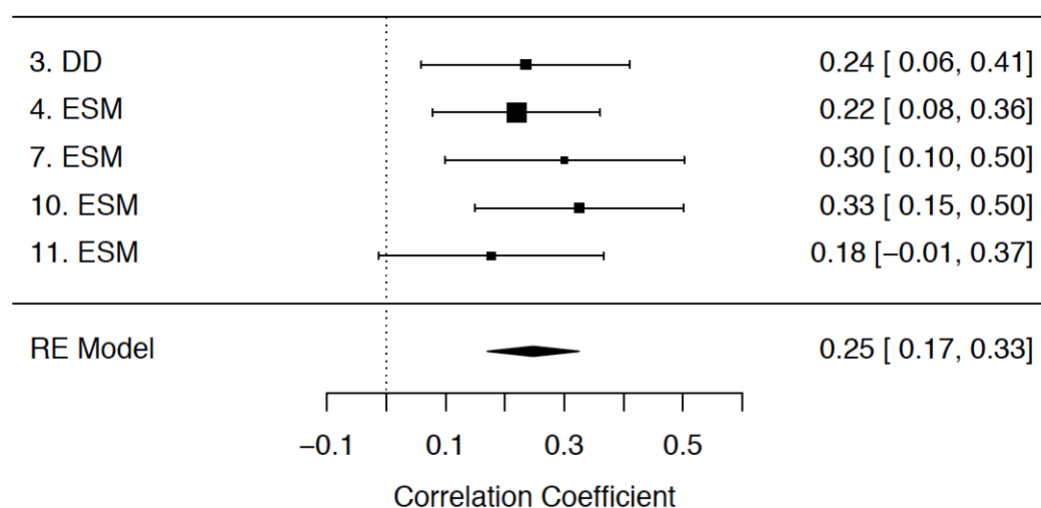

Figure S4. Forest plot of the association between neuroticism and negative emotional variability for datasets using the BFI.

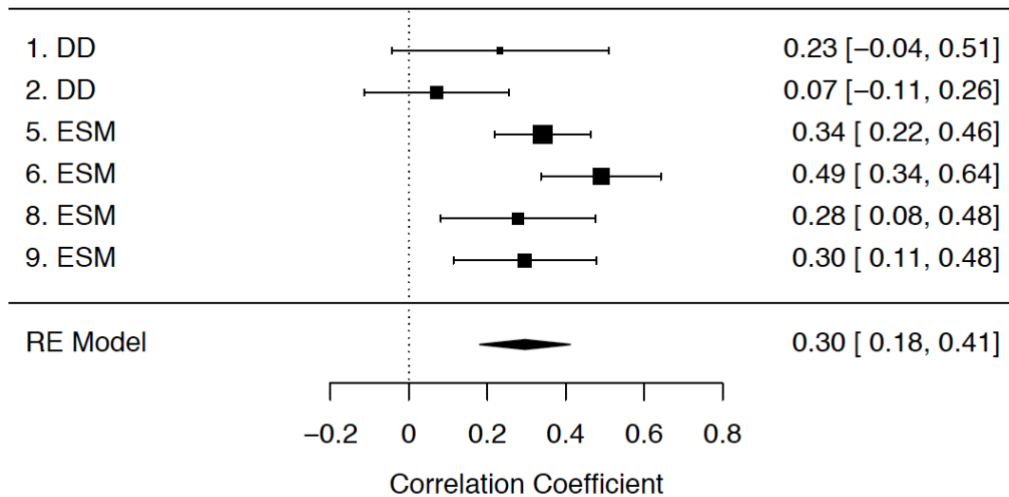

Figure S5. Forest plot of the association between neuroticism and negative emotional variability for datasets using the TIPI.

Figure S6 provides the results of a meta-analysis of the relationship between neuroticism and the within-person *SD* of the daily maximum negative emotion for datasets using the BFI. Figure S7 provides the same analyses for datasets using the TIPI.

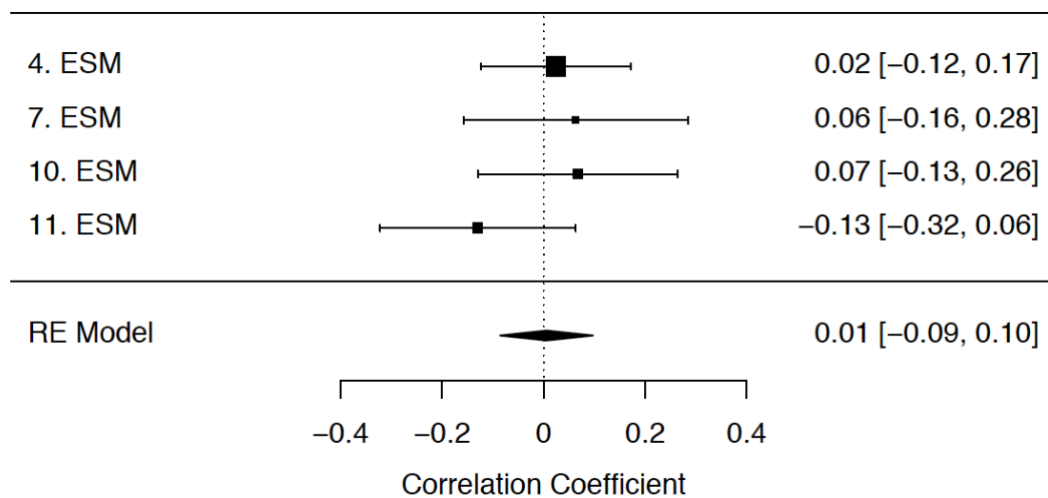

Figure S6. Forest plot of the association between neuroticism and variability in maximum daily negative emotion for datasets using the BFI.

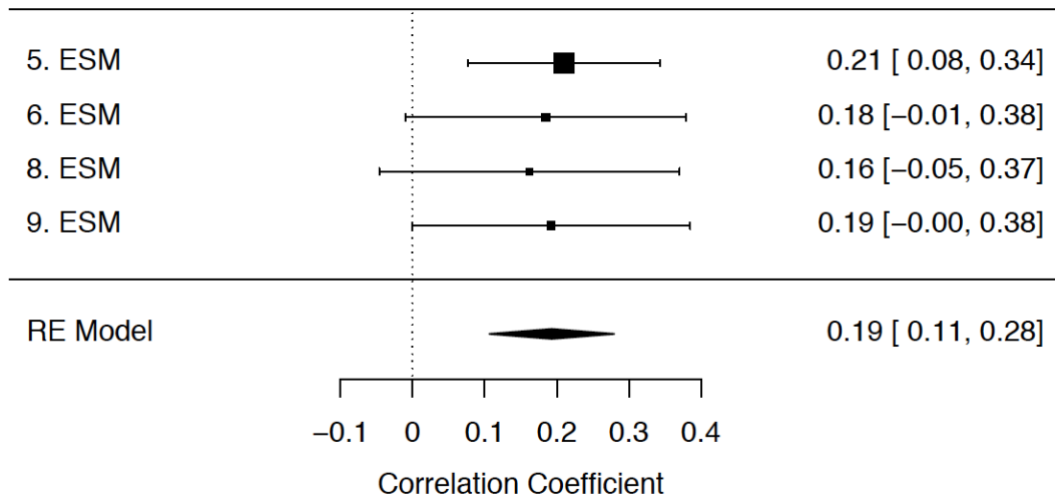

Figure S7. Forest plot of the association between neuroticism and variability in maximum daily negative emotion for datasets using the TIPI.

Figure S8 provides the results of a meta-analysis of the relationship between neuroticism and the relative variability in negative emotion for datasets using the BFI, and Figure S9 provides the results for the same analyses using the TIPI.

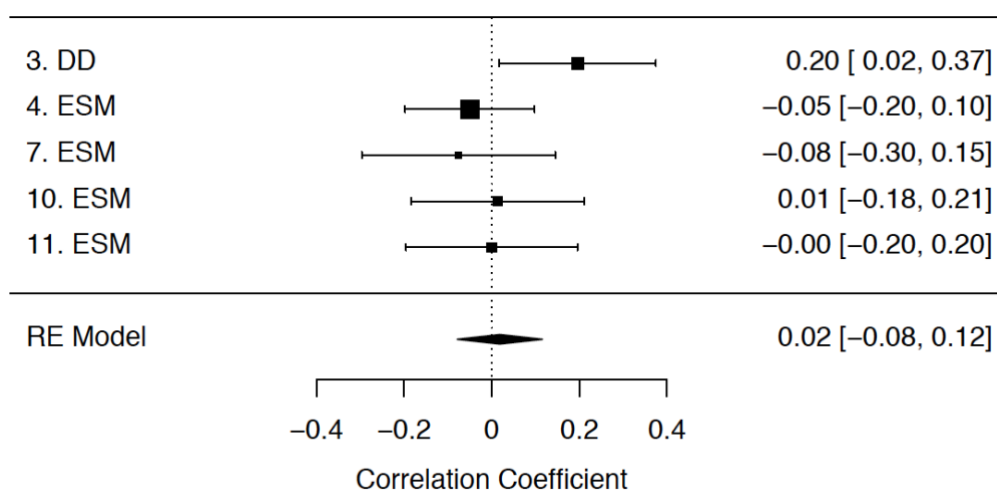

Figure S8. Forest plot of the association between neuroticism and relative variability in negative emotion for datasets using the BFI.

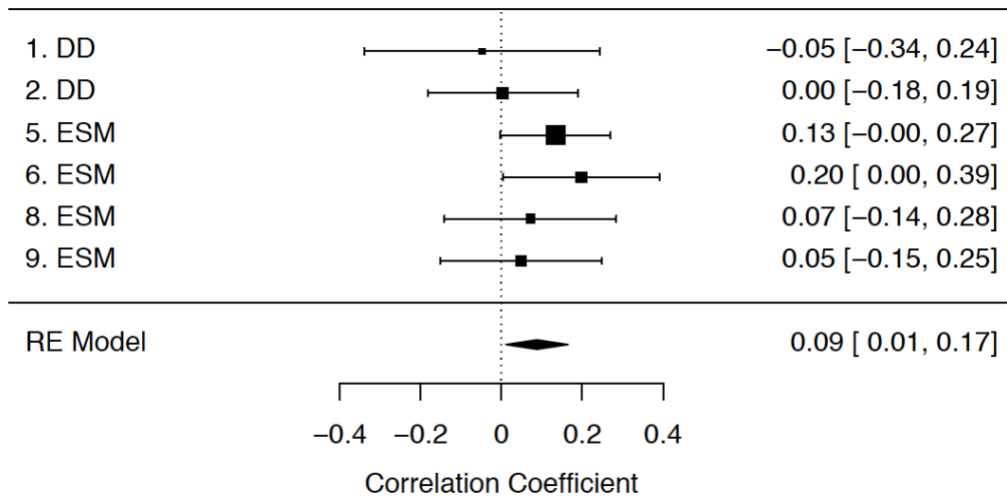

Figure S9. Forest plot of the association between neuroticism and relative variability in negative emotion for datasets using the TIPI.

### Part 5: Relationship between Negative Emotion Within-Person SD Across all Time-Points and Within-Person SD for Daily Maxima

In these analyses, we investigate the relationship between the within-person *SD* across all time-points and the within-person *SD* in the daily maxima (for the experience-sampling datasets with multiple time-points per day). This helps us understand whether variability in the daily maxima is tapping the same construct as variability across all time-points (with the major difference being that the daily max measure has less 0 scores). Figure S10 provides the results of this meta-analysis.

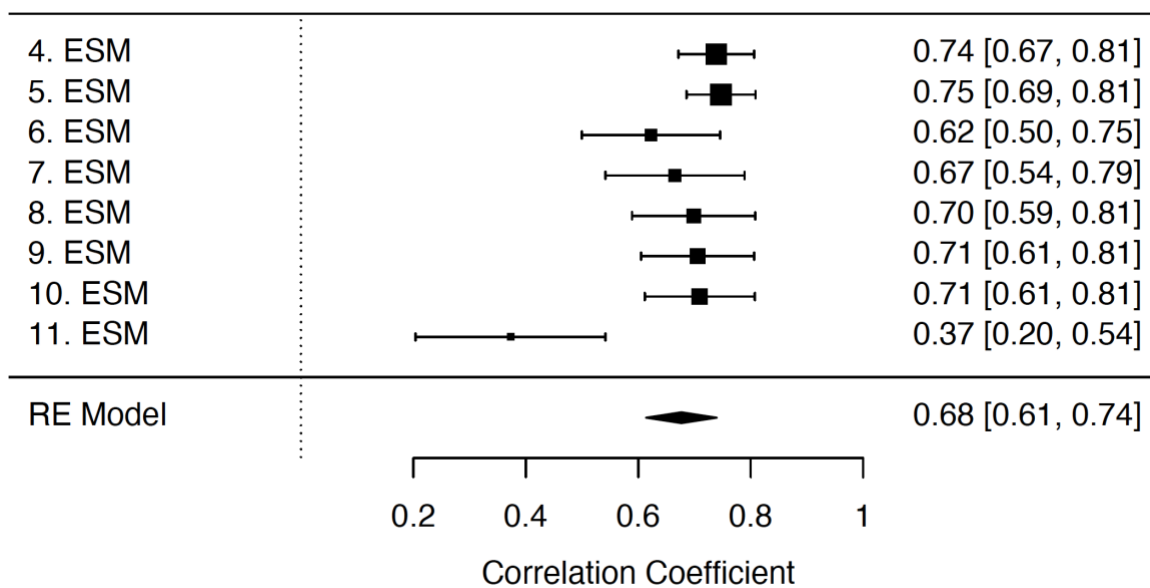

Figure S10. Forest plot of the association between variability across all time-points and variability in maximum daily negative emotion for experience-sampling datasets.

We find that there is a strong positive correlation between the two indices ( $r = .68$ ), suggesting that they are partially tapping the same construct, with some differences.

**Part 6: Correlation Between 1) Neuroticism and the Negative Emotion Within-Person *SD* After Partialling Out Mean Levels, and 2) Neuroticism and the Negative Emotion Mean After Partialling Out Within-Person *SD***

In these analyses, we first investigated the correlation between neuroticism and the negative emotion within-person *SD* after partialling out the effect of mean levels. These analyses are less conservative than the analysis using the relative variability index (since they do not account for potential curvilinear relationships, or for multicollinearity), but present an additional piece of evidence for the role of a mean – variability dependency clouding the relationship between neuroticism and negative emotional variability. Figure S11 provides the results of this meta-analysis.

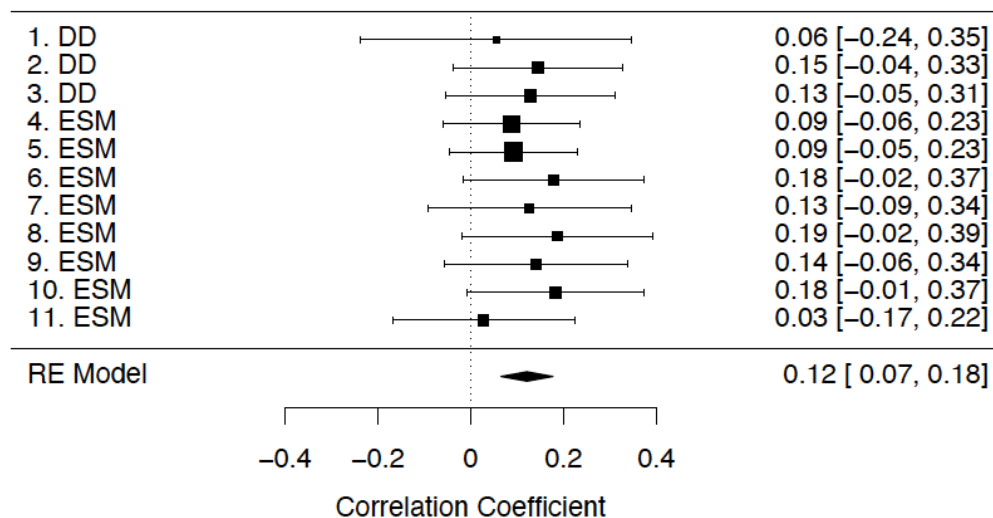

Figure S11. Forest plot of the association between neuroticism and the adjusted within-person *SD* of negative emotion after partialling out the effect of mean levels.

In this analysis, we found that the effect of neuroticism on the within-person *SD* was still significant but had dropped in size substantially ( $r = .12$  from an original effect of  $r = .28$ ).

We also ran the inverse analysis, investigating the correlation between neuroticism and mean levels of negative emotion after partialling out the effect of the within-person *SD*. Figure S12 provides the results of this meta-analysis.

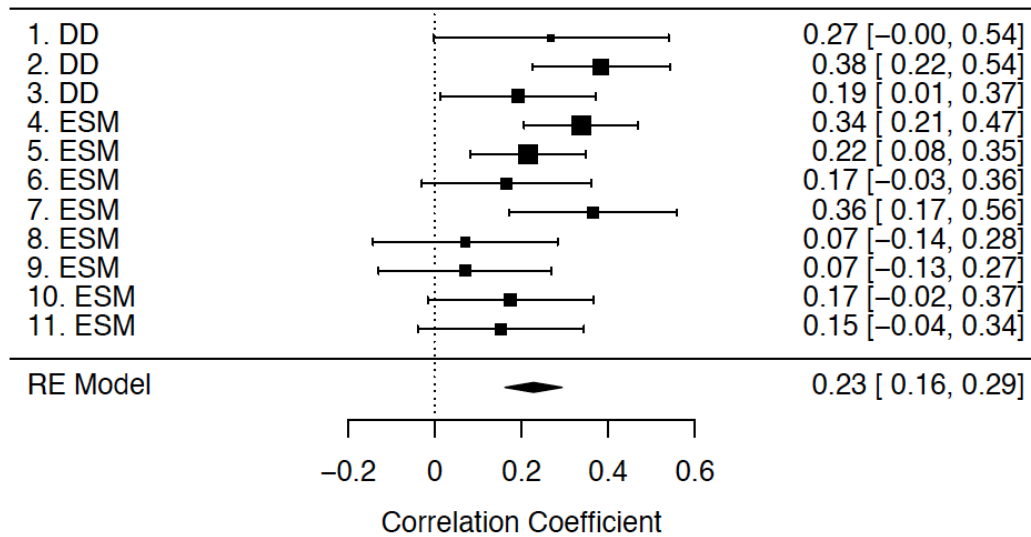

Figure S12. Forest plot of the association between neuroticism and the adjusted mean levels of negative emotion after partialling out the effect of the within-person *SD*.

We found that the effect of mean levels was still significant in this analysis ( $r = .23$ ), although it had also dropped in size (from  $r = .36$ ). The effect of neuroticism on adjusted mean levels was stronger than the effect on the adjusted within-person *SD* ( $r = .23$  vs.  $r = .12$ ), providing additional evidence for the primacy of the mean.
